# Supplementary material
Source: PubMed Central journal article supplement (PMC7357668)
Supplement: candisc-10-0916-s001.pdf [file candisc-10-0916-s001.pdf]

**Supplementary Table 1.**
**Cancer drugs targeting the identified virus-host protein-protein interactions of SARS-CoV-2**

| Pathway                      | Target Gene | Drug               | Status          | Cancer Treatment Investigation            | Effect on <i>in vitro</i> Viral Infection |
|------------------------------|-------------|--------------------|-----------------|-------------------------------------------|-------------------------------------------|
| Cell cycle / DNA damage      | NEK9        | Dabrafenib         | Approved        | BRAF-mutation related tumors              | N/A                                       |
|                              | RIPK1       | Ponatinib          | Approved        | leukemia, lung                            | Neutral                                   |
|                              | RIPK1       | Pazopanib          | Approved        | solid tumors                              | Neutral                                   |
| Metabolism                   | IMPDH2      | Mycophenolic acid  | Approved        | leukemia                                  | Neutral                                   |
|                              | NDUFAF2     | Metformin          | Approved        | oral, breast, prostate, colorectal, liver | Inhibitory                                |
| Epigenetics / Chromatin      | HDAC2       | Valproic acid      | Approved        | glioblastoma                              | Neutral                                   |
|                              | DNMT1       | Azacitidine        | Approved        | leukemia                                  | N/A                                       |
|                              | BRD2/4      | ABBV-744           | Clinical trials | leukemia                                  | Neutral                                   |
|                              | BRD2/4      | CPI-0610           | Clinical trials | solid tumors, leukemia                    | Neutral                                   |
| Translation / RNA processing | mTOR        | Rapamycin          | Approved        | solid tumors                              | Neutral                                   |
|                              | mTOR        | Sapanisertib       | Clinical trials | solid tumors                              | Neutral                                   |
|                              | eIF4A       | Zotatifin          | Clinical trials | solid tumors                              | Inhibitory                                |
|                              | MNK1/2      | Tomivosertib       | Clinical trials | breast, prostate, lymphoma                | Neutral                                   |
|                              | CRM1        | Selinexor          | Approved        | myeloma, solid tumors                     | N/A                                       |
| MARK-kinases                 | MARK2       | Midostaurin        | Approved        | leukemia                                  | Activating                                |
|                              | MARK2/3     | Ruxolitinib        | Approved        | pancreatic, blood                         | Activating                                |
| Membrane transport           | ABCC1       | Daunorubicin       | Approved        | leukemia                                  | Activating                                |
|                              | ABCC1       | Verapamil          | Approved        | lung, colorectal, gastric, kidney         | Neutral                                   |
| Stress response              | HSP90       | Onalespib          | Clinical trials | solid tumors                              | Inhibitory                                |
| Cul2 complex                 | NAE         | Pevonedistat       | Clinical trials | solid tumors, leukemia                    | N/A                                       |
| Stress granule regulation    | CSNKA2      | Silmitasertib      | Approved        | medulloblastoma                           | Neutral                                   |
| Autophagy                    | SIGMAR1     | Hydroxychloroquine | Approved        | solid tumors                              | Inhibitory                                |
| Replication                  | -           | Brivudine          | Clinical trials | colorectal                                | Activating                                |
